# Supplementary material for: Synergistic Effect of Spark Plasma Sintering Driven Solid-Solution Phases on Scratch Resistance in Two-Dimensional Materials
Source: MDPI journal article supplement (doi:10.3390/lubricants12020031), 2024-01-24
Supplement: s1 [file s1]

## Supplementary Information

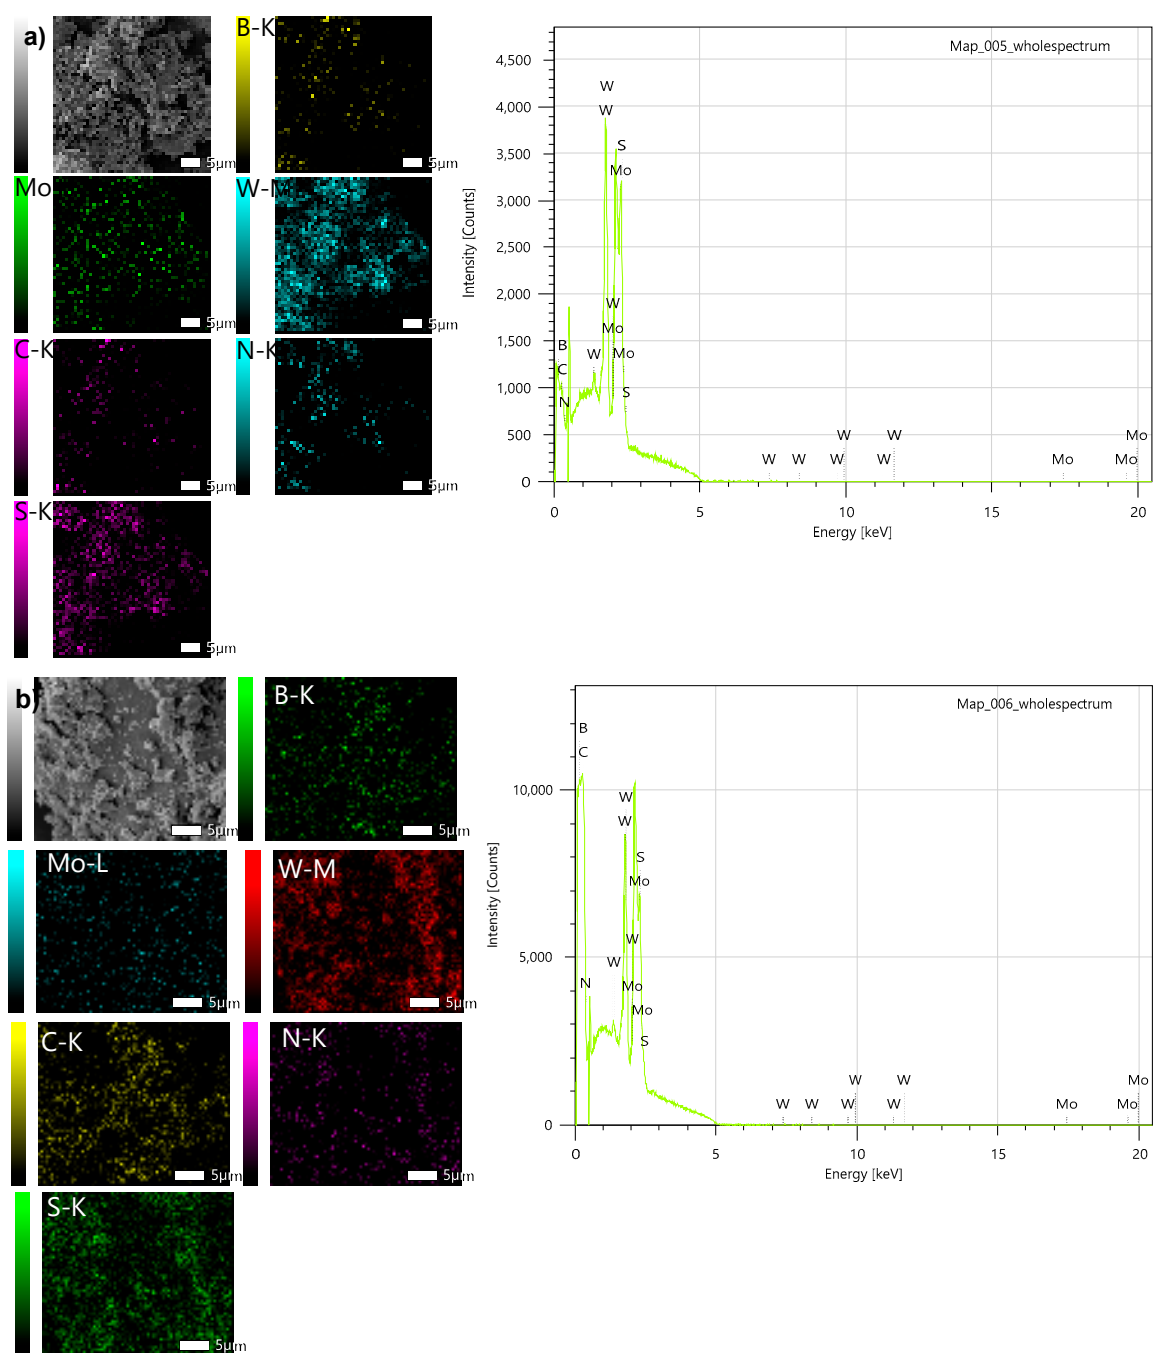

**Figure S1:** Energy dispersive spectroscopy (EDS) mapping and corresponding spectra eliciting the elemental distribution in **(a)** BM, and **(b)** CM powders.

## B<sub>4</sub>C phase

a) 3D-Map

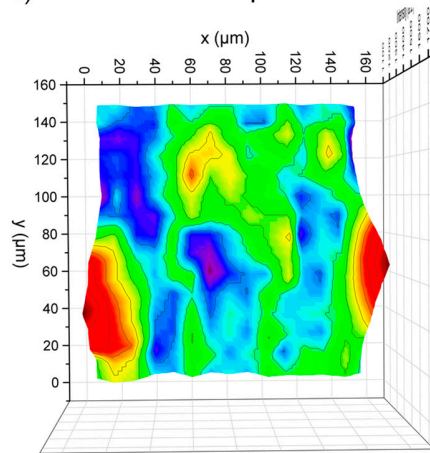

2D-Profile

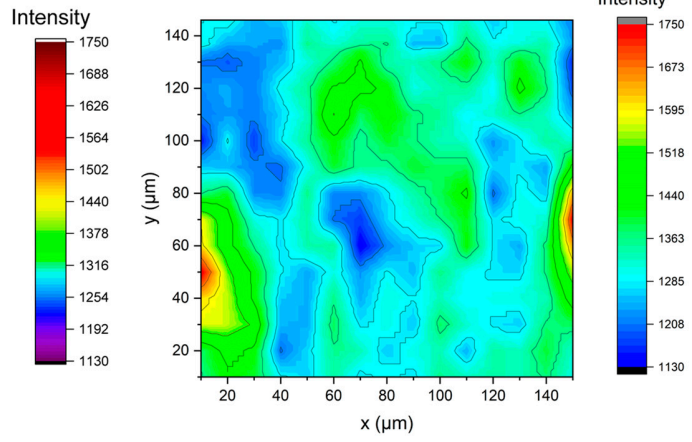

b) 3D-Map

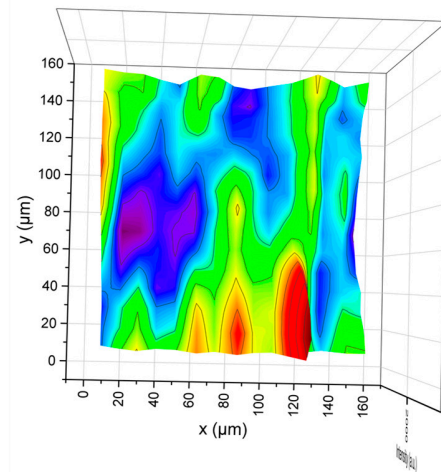

2D-Profile

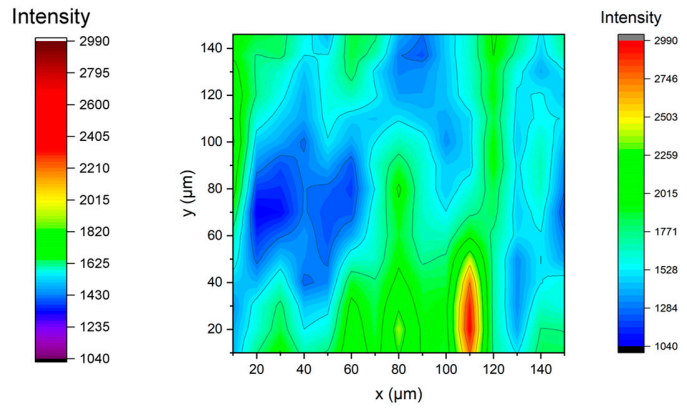

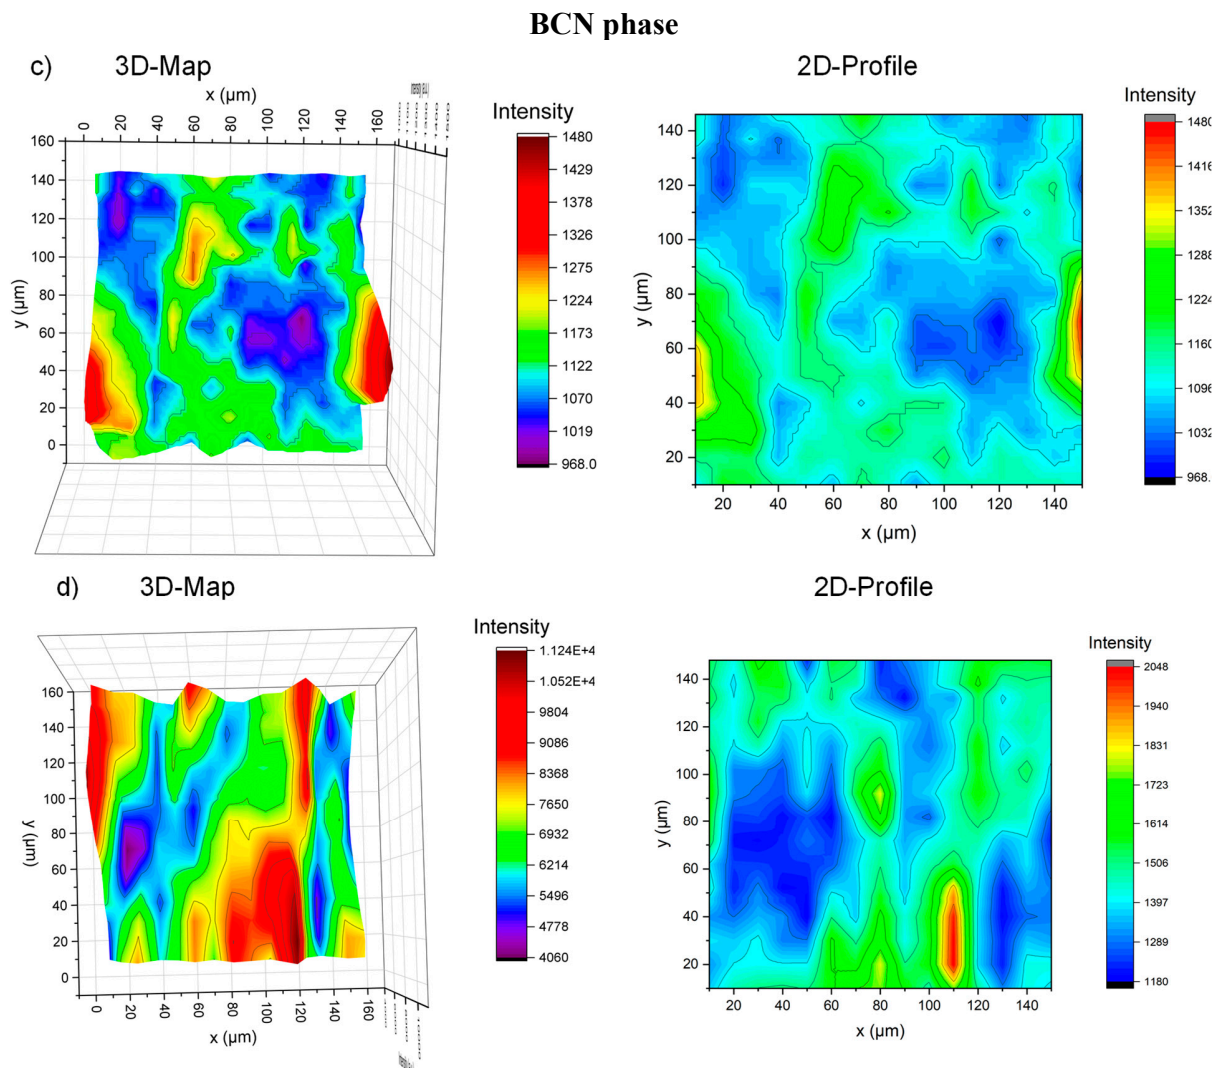

**Figure S2:** 3D chemical map and the representative 2D profile obtained from the sample surface corresponding to B<sub>4</sub>C phase in (a) BM, and (b) CM samples, and BCN phase in (c) BM, and (d) CM sample.
